# Supplementary material for: DiMeX: A Text Mining System for Mutation-Disease Association Extraction
Source: PLoS One. 2016 Apr 13;11(4):e0152725. doi: 10.1371/journal.pone.0152725 (PMC4830514; doi:10.1371/journal.pone.0152725)
Supplement: S1 Dataset — (XLSX) [file pone.0152725.s001.xlsx]

## Sheet: Sheet1
PMID	Gene/Protein name	Cancer Type	AA variantion	Nucleotide variation	position	rsID
11827465
19638588	CTLA-4	cancer		A>G	49
20043205	IL-6	breast cancer		G>C	-174
20226083	RRM1	non small cell lung cancer		C>A	-37
20226083	RRM1	non small cell lung cancer		A>G	2455
20226083	RRM1	non small cell lung cancer		G>A	2464
20234319	CHRNA3	non-small cell lung cancer				rs3743076
20234319	CHRNA3	non-small cell lung cancer				rs3743073
20234319	CHRNA3	non-small cell lung cancer				rs3743078
20308648	OCA2	breast cancer		C>G		rs4778137
20376705	SELP	cancer		C>G	-2123
20376705	SELP	cancer		G>A	-1969
20376705	SELP	cancer	T715P
20376705	PSGL-1	cancer	Met62Ile
20538028	CTLA-4	hepatocellular carcinoma and cervical cancer		A>G	49	rs231775
20618614	VEGF	oral squamous cell carcinoma		G>A	-1154
20618614	VEGF	oral squamous cell carcinoma		C>C	405
20618614	VEGF	oral squamous cell carcinoma		C>T	936
20618614	VEGF	oral squamous cell carcinoma		C>A	-2578
20618614	VEGF	oral squamous cell carcinoma		C>T	-460
20630073	MMP-3	HNSCC		5A>6A	-1171
20651075	ITGA6	Prostate cancer				rs12621278
20718756	ABC11	adenocarcinoma		G>A	538
20731661
20813679	CTLA-4	Hepatocellular carcinoma		G>A	49
20855462	Mdm2	prostate cancer		>T	309
20863780	XPD	Gastric Cancer	Asp312Asn
20863780	XRCC1	Gastric Cancer	Arg194Trp
20863780	XRCC1	Gastric Cancer	Arg280Gln
20945404	KLRG2	Prostate cancer				rs17160911
20960227	CYP19A1	Breast cancer				rs4646
20960227	CYP19A1	Breast cancer				rs7167936
20960227	CYP19A1	non-hormone related breast cancers				rs4646
20960227	CYP19A1	non-hormone related breast cancers				rs7167936
20978324	Survivin	colorectal cancer		C>T	9386
20978324	Survivin	colorectal cancer		G>C	-31
21036138	CD95	T-Cell lymphoma		>GG	-671
21046495	MUC16	Epithelial ovarain cancer		A/C		rs1596797
21046495	MUC16	Epithelial ovarain cancer		C/G		rs2547065
21070779	Mucin1 (?)	Diffuse-Type Gastric Cancer				rs2294008
21070779	Mucin1	Diffuse-Type Gastric Cancer				rs2070803
21070779	Mucin1	Diffuse-Type Gastric Cancer				rs4072037
21125332	PRL	breast cancer				rs3756824
21125332	PRLR	breast cancer				rs10941235
21182469	ABCC11/MRP8	breast cancer	Gly180Arg	G>A	538
21203900	BRCA1	breast/ovarian cancer			c.80+4del4
21203900	BRCA1	breast/ovarian cancer			c.1938_1947del10
21203900	BRCA1	breast/ovarian cancer			c.1166delG
21203900	BRCA2	breast/ovarian cancer			c.6589delA
21216841	XRCC1	gastric cancer	Arg194Trp
21216841	XRCC1	gastric cancer	Arg280His
21216841	XRCC1	gastric cancer	Arg399Gln
21239504	ANXA11	Metastatic Colorectal Cancer				rs1049550
21239504	LINS1	Metastatic Colorectal Cancer				rs11247226
21239504	DFNB31	Metastatic Colorectal Cancer				rs2274159
21239504	LIFR	Metastatic Colorectal Cancer				rs3729740
21239504	ISX	Metastatic Colorectal Cancer				rs361863
21239504	LIFR	colorectal cancer		>GG		rs3729740
21239504	ISX	colorectal cancer		>C		rs361863
21390317	KLK3	Prostate cancer				rs2735839
21390317	KLK3	Prostate cancer				rs266849
21457555	BCL-2	breast cancer		C>A	-938
21483023	CMKLR1	NSCLC				rs1878022
21483023	CMKLR1	NSCLC				rs10937823
21487925	EGFR	thyroid cancer	G735S	G>A	2203
21487925	MMP8	thyroid cancer	K87E	A>G	259
21520031	WWOX	Thyroid carcinoma	Pro-282-Ala			rs3764340
21547352	MDM2	endometrial cancer		T>G	309
21709439	HIF-1a	pancreatic cancer		C>T	1772
21709439	HIF-1a	pancreatic cancer		G>A	1790
21787115	CHEK2	endometrical cancer				rs8135424
21901234	FXIII-A	cancer-associated venous thrombosis	Val34Leu	G>A	-455
21935604	ALCAM	breast cancer				rs1044243
21935604	ALCAM	breast cancer				rs1157
21960110	CD24	primary breast cancer	Ala57Val	C>T	170
21996731	TNRC9	breast cancer				rs3803662
21996731	MAP3K1	breast cancer				rs889312
22200742	ATM	Cervical cancer	D1853N	G>A	5557
22200742	53bp1	Cervical cancer	D353E	C>G	1236
22335769	IL-10	Gastric Cancer		A/G	1082
22436502	IL10	Gastric cancer		T>C	-819
22567180	ERCC1	Colorectal cancer		C>T	118
23053986	DNMT3A	Gastric cancer		A>G		rs36012910
23100065	TNF-alpha	Lung cancer		G>A	-238
23100065	IL-6	Lung cancer		C>G	-572
23109454	MDR1	Hepatocellular cancer		C>T	3435
23153021	FAS	Oral cancer		G>A	-1377	rs2234767
23153021	FAS	Oral cancer		A>G	-670
23153021	FASL	Oral cancer		T>C	-844	rs1800682
23221126	CXCL3	Endometrial cancer				rs352038
23221126	MMP9	Endometrial cancer				rs3918249
23226373	FGFR4	squamous cell carcinoma of the mouth and oropharynx.	Gly388
23227881	VEGF	oral squamous cell carcinoma		A/C	-2578
23227881	VEGF	oral squamous cell carcinoma		C/T	-460
23227881	VEGF	oral squamous cell carcinoma		A/A	-1154
23227881	VEGF	oral squamous cell carcinoma		G/G	405
23316210	ABCC11		Gly180Arg	G>A	538
23525077
23555554	AGAP11/C10orf116	Ovarian cancer		A/C		rs4934282
23555554	DNAH14	Ovarian cancer		A/G		rs1857623
23583797	PASD8	Cancers		G/A	1790	rs11549467
23583797	PASD8	Cancers		C/T	1772	rs11549465
23613680
23675264	PLD	Non-Small Cell Lung Cancer		A>C	2698
23675264	PLD	Non-Small Cell Lung Cancer		A>C	2744
23675264	PLD	Non-Small Cell Lung Cancer		A>C	2756
23719599	VEGF	pancreatic cancer		T/C	-460
23719599	VEGF	pancreatic cancer		G/C	405
23719599	VEGF	pancreatic cancer		C/T	936
23727606	ERCC1	non-small cell lung cancer		C>T	118
23727606	ERCC1	non-small cell lung cancer		C>A	8092
23792017	COX-2	breast cancer		C>G	169
23792017	COX-2	breast cancer		T>C	8473
23917080	ABCB1	epithelial ovarian cancer		C>T	1236	rs1128503
23917080	ABCB1	epithelial ovarian cancer		G>T	2677T/A	rs2032582
23917080	ABCB1	epithelial ovarian cancer		C>T	3435	rs1045642
23933413	ICAM-1	epithelial ovarian cancer				rs5498
24146310	FGF1	Ovarian cancer				rs7727832
24146310	FGF7	Ovarian cancer				rs9920722
24146310	FGF23	Ovarian cancer				rs12812339
24146310	FGF5	Ovarian cancer				rs3733336
24146310	FGF18	Ovarian cancer				rs3806929
24146310	FGF23	Ovarian cancer				rs7961824
