# Supplementary material for: DiMeX: A Text Mining System for Mutation-Disease Association Extraction
Source: PLoS One. 2016 Apr 13;11(4):e0152725. doi: 10.1371/journal.pone.0152725 (PMC4830514; doi:10.1371/journal.pone.0152725)
Supplement: S3 Dataset — (XLSX) [file pone.0152725.s003.xlsx]

## Sheet: Sheet1
PMID	Mutation	Gene	Disease
18278587	3536delT	BRCA1	ovarian adenocarcinoma
18499683
18779738
18930998	I157T	CHEK2	breast cancer
18945219	C677T	methylenetetrahydrofolate reductase	liver cancer
18945219	C677T	methylenetetrahydrofolate reductase	hepatocellular carcinoma
18978817	-9 G&gt ; A	delta-catenin	prostate cancer
19000729	methionine ( met ) to valine	MICA	nasopharyngeal cancer
19006239
19009560	-460T&gt ; C	VEGF	colorectal cancer
19009560	-2578C&gt ; A	VEGF	CRC
19009560	-1154G&gt ; A	VEGF	CRC
19009560	+936C&gt ; T	VEGF	colorectal adenocarcinoma
19009560	-634G&gt ; C	VEGF	colorectal adenocarcinoma
19009560	-460T&gt ; C	VEGF	CRC
19009560	-1154G&gt ; A	VEGF	colorectal adenocarcinoma
19009560	-634G&gt ; C	VEGF	CRC
19037087
19115208	T-786C	eNOS	colorectal cancer
19115208	G894T	eNOS	colorectal cancer
19133231	R129C	EpoR	breast cancer
19148475	G1638C	PIK3CA	invasive cervical carcinomas
19148475	Q546H	PIK3CA	invasive cervical carcinomas
19148475	G1638C	PIK3CA	cervical cancer
19148475	Q546H	PIK3CA	cervical cancer
19183332
19196101	rs2228014	VEGF	breast cancer
19196101	rs12812942	VEGF	breast cancer
19196101	rs3025039	VEGF	breast cancer
19233166
19243822
19269317
19288574
19308294
19336729
19343042	-904 G&gt ; A	CDK5	lung cancer
19372556
19383810	1592delT	PALB2	breast cancer
19387476
19404735	Asp2597 Lys	ATM	breast cancer
19404735	c7789G&gt ; T	ATM	breast cancer
19404735	Asp2597Tyr	ATM	breast cancer
19435508	-271 G&gt ; A	KDR	lung cancer
19470935
19477992
19495883	1846C&gt ; T	CRP	thoracic esophageal squamous cell cancer
19565885	A80G	RFC-1	cervix carcinoma
19565885	A80G	RFC-1	cervical cancer
19610054
19622968
19640273
19682879
19691112
19692934
19695319
19711434	S142G	TFRC	leukemia
19715467	2999delCT	BRCA2	ovarian cancer
19715467	2999delCT	BRCA2	breast-ovarian cancer
19747390
19775331
19781162
19789305
19789314	E542K	LKB1	bladder cancer
19789314	E545K	LKB1	bladder cancer
19794292
19795481	I2285V	BRCA2	breast cancer
19796187	5301insA	BRCA2	breast cancer
19804630
19827589
19851859	Ile2490Thr	BRCA2	breast cancer
19851859	Ile2490Thr	BRCA2	lobular carcinoma
19875696	rs7211818	RAPTOR	bladder cancer
19875696	rs11653499	RAPTOR	bladder cancer
19875696	rs7212142	RAPTOR	bladder cancer
19875696	rs9674559	regulatory associated protein of mTOR	bladder cancer
19884556
19888861
19896412
19896728
19915670
19956916	1-93G--&gt ; A	hMLH1	prognosis of lung cancer
19956916	1-93G--&gt ; A	hMLH1	lung cancer
20010525	Thr1915Met	BRCA2	breast cancer
20010525	Met784Val	BRCA2	breast cancer
20010525	rs4987117	BRCA2	breast cancer
20010525	rs11571653	BRCA2	breast cancer
20012711
20027114
20054636	2-164 A/C	CYP1A2	breast cancer
20072938
20072949
20083228
20084546	A-202C	IGFBP3	breast cancer
20119675
20143185	C118T	ERCC1	advanced non-small cell lung cancer
20143185	Asp312Asn	XPD	advanced non-small cell lung cancer
20143185	Lys751Gln	XPD	advanced non-small cell lung cancer
20143185	Lys751Gln	XPD	advanced NSCLC
20143185	Asp312Asn	XPD	advanced NSCLC
20151938	3171ins5	BRCA1	breast cancer
20151938	3171ins5	BRCA1	excess number of ovarian cancer
20151938	3171ins5	BRCA1	ovarian cancer
20180014
20184486	G1057D	insulin receptor substrate-2	endometrial cancer
20209490	Rs9920	cav-1	prostate cancer
20219108
20229816
20233853	Val(16) Ala	MnSOD	gastric cancer
20351092
20353086
20358470
20376807	-82A/G	MMP-12	epithelial ovarian carcinoma
20376807	-77A/G	MMP-13	epithelial ovarian carcinoma
20376807	-82A/G	MMP-12	serous-papillary and mucinous ovarian cancer
20376807	-77A/G	MMP-13	serous-papillary and mucinous ovarian cancer
20391126	Ile105Val	GSTP1	esophageal carcinoma
20398348	H1047R	PIK3CA	gastric cancer
20398348	Q546K	PIK3CA	gastric carcinoma
20398348	Q546K	PIK3CA	gastric cancer
20398348	H1047R	PIK3CA	gastric carcinoma
20422428
20455026	4A &gt ; G	BRCA2	breast cancer ovarian cancer
20455026	5215G &gt ; A	BRCA1	breast cancer ovarian cancer
20455026	5096G &gt ; A	BRCA1	breast cancer ovarian cancer
20459744
20484221	A-202C	IGFBP3	prostate cancer
20484221	rs2854746	IGFBP3	prostate cancer
20484221	Gly32Ala	IGFBP3	prostate cancer
20484221	rs4764695	IGF1	prostate cancer
20501853
20628285	1439delGGA	MUTYH	colorectal cancer
20628285	31del13	MUTYH	colorectal cancer
20630075
20640595	135G/C	RAD51	breast cancer
20665483
20691664
20694749	R1443X	BRCA1	breast cancer
20694749	E3002K	BRCA2	breast cancer
20694749	E1953X	BRCA2	breast cancer
20694749	8765delAG	BRCA2	breast cancer
20694749	R1443X	BRCA1	hereditary breast cancer
20711808	rs5277	PTGS2	breast cancer
20730487
20814629	1082-1083insC	PPOX	Hepatocellular carcinoma
20857202	V600E	BRAF	colorectal cancer
20870918
20878484	7526insT	BRCA2	breast cancer
20920750
20924409
20944125
20951805
20957490	C677T	MTHFR	gastric cancer
20971884
20978259	G12V	KRAS	colorectal cancer
20978259	G13D	KRAS	colorectal cancer
20978259	G13D	KRAS	chemotherapy-refractory colorectal cancer
21078522	rs3741211	IGFII	endometrial cancer
21078522	rs2453839	IGFBP-3	endometrial cancer
21078522	rs1004446	IGFII	endometrial cancer
21079811
21084428
21104146	-174G&gt ; C	IL-6	bladder cancer
21109973
21146147
21148747
21163569	D543N	NRAMP1	bladder cancer
21169260
21192840
21198273	8473T&gt ; C	cyclooxygenase-2	lung cancer
21198273	8473T&gt ; C	cyclooxygenase-2	reduced lung cancer
21199646
21242260	rs6983267	SMAD7	Colorectal cancer
21242260	rs7837328	SMAD7	Colorectal cancer
21242260	rs7758229	SMAD7	distal colon cancer
21242665
21266528	K111E	p110alpha	endometrial carcinomas
21266528	G106V	p110alpha	endometrial carcinomas
21266528	E453K	p110alpha	endometrial carcinomas
21266528	R93W	p110alpha	endometrial carcinomas
21266528	G106R	p110alpha	endometrial carcinomas
21269855
21270613	Thr461Asn	Msp1	endometrial cancer
21270613	Ile462Val	Msp1	endometrial cancer
21274559
21274727	T36M	PKHD1	colorectal carcinoma
21274727	T36M	PKHD1	colorectal cancer
21301999	rs7903146	TCF7L2	breast cancer
21301999	rs12255372	TCF7L2	breast cancer
21314139
21324374
21339293
21343373	rs6983267	MSMB	prostate cancer
21343373	rs10993994	MSMB	prostate cancer
21343373	rs4242382	MSMB	metastatic prostate cancer
21343373	rs6983267	MSMB	metastatic prostate cancer
21343373	rs4242382	MSMB	prostate cancer
21343373	rs10993994	MSMB	metastatic prostate cancer
21358673
21362302
21363919
21406719
21419771	A636P	MSH2	colorectal cancer
21419771	A636P	MSH2	endometrial cancer
21427728	-77C&gt ; T	BRCA2	breast cancer
21427728	Gln399Arg	BRCA2	breast cancer
21427728	rs25489	BRCA2	breast cancer
21427728	rs25487	BRCA2	breast cancer
21427728	Arg280His	BRCA2	breast cancer
21431326
21444874
21499418
21514184	T81C	HRAS	bladder cancer
21514184	T81C	HRAS	various cancers
21528353	rs1801132	ESR1	breast cancer
21528353	rs2234693	ESR1	breast cancer
21528353	rs1038304	ESR1	breast cancer
21528353	rs2046210	ESR1	breast cancer
21528353	rs10484919	ESR1	breast cancer
21528353	rs6929137	ESR1	breast cancer
21529907	rs2910164	PCR	cervical cancer
21537389	rs1799884	glucokinase	prostate cancer
21537389	rs1799884	glucokinase	advanced cancers
21537389	rs1799884	glucokinase	advanced stage cancer grade cancers
21538054	-1263 A&gt ; G	CASP9	colorectal cancer
21538054	-1263 AG	Caspase-9	colorectal cancer
21545219	tyrosine2842serine	GSTT1	oral cancer
21565170
21592819	rs1801157	CXCL12	breast cancer
21666281	I26A	BRCA1	breast cancer
21666281	K1702M	BRCA1	breast cancer
21666281	M1775R	RAD51	breast cancer
21673748	520C&gt ; T	BRCA2	breast and ovarian cancer
21673748	212+3A&gt ; G	BRCA1	breast and ovarian cancer
21673748	7992T&gt ; A	BRCA2	breast and ovarian cancer
21673748	5194-12G&gt ; A	BRCA1	breast and ovarian cancer
21673748	7977-7C&gt ; G	BRCA2	breast and ovarian cancer
21673748	7977-7C&gt ; G	BRCA2	breast cancer
21673748	212+3A&gt ; G	BRCA1	breast cancer
21673748	5194-12G&gt ; A	BRCA1	breast cancer
21673748	212+3A&gt ; G	BRCA1	ovarian cancer
21673748	7977-7C&gt ; G	BRCA2	ovarian cancer
21673748	5194-12G&gt ; A	BRCA1	ovarian cancer
21706163	Glu298Asp	NOS3	colorectal cancer
21718492
21722621
21744340
21751003	2080insA	BRCA1	renal cell carcinoma
21766210	rs11060845	AGO2	breast cancer
21766210	rs1991401	p68	breast cancer
21766210	rs3864659	AGO2	breast cancer
21766210	rs595055	AGO1	breast cancer
21769658	4987-2A&gt ; G	BRCA1	breast and ovarian cancer
21769658	4185+2del	BRCA1	breast and ovarian cancer
21769658	c5074G&gt ; C	BRCA1	breast and ovarian cancer
21769658	c3G&gt ; A	BRCA2	breast and ovarian cancer
21769658	4357+1G&gt ; A	BRCA1	breast and ovarian cancer
21769658	8754+3G&gt ; C	BRCA2	breast and ovarian cancer
21769658	316+5G&gt ; A	BRCA2	breast and ovarian cancer
21769658	441+2T&gt ; A	BRCA1	breast and ovarian cancer
21773856	W741C	Androgen receptor	prostate cancer
21773856	T877A	Androgen receptor	prostate cancer
21778575
21791569	646-254del	MSH2	colorectal and endometrial cancer
21791603
21798758	+874 A/T	IFN-gamma	breast cancer
21804359
21805310	G700R	SLX4	breast cancer
21805310	G700R	SLX4	Hannover breast cancer
21811587
21841506	P73 G	P53	non-small cell lung cancer
21841506	P53 Arg	P53	non-small cell lung cancer
21841506	rs1801173	P53	non-small cell lung cancer
21841506	T309G	MDM2	non-small cell lung cancer
21841506	rs1042522	P53	non-small cell lung cancer
21841506	rs2273953	P53	non-small cell lung cancer
21841506	Arg72Pro	P53	non-small cell lung cancer
21841506	rs2279744	MDM2	non-small cell lung cancer
21852217	10212C&gt ; A	IGF1	pancreatic cancer
21852217	45+11C&gt ; T	IGF2R	pancreatic cancer
21852217	I253M	IGFBP1	pancreatic cancer
21852217	4+2776G&gt ; A	IGF1	pancreatic cancer
21852217	4+111A&gt ; G	IGFBP1	pancreatic cancer
21852217	IVS2+46329T&gt ; C	IGF1R	pancreatic cancer
21852217	IVS2-70184A&gt ; G	IGF1R	pancreatic cancer
21852217	45+11C&gt ; T	IGF2R	increased and decreased pancreatic cancer
21858804	rs769236	CCNA2	breast cancer
21858804	rs769236	CCNA2	gastric cancer
21858804	rs769236	CCNA2	lung cancer
21858804	rs769236	CCNA2	hepatocellular carcinoma
21858804	rs769236	CCNA2	colorectal cancer
21862584
21896990	rs1867277	FOXE1	thyroid cancer
21896990	-238G&gt ; A	FOXE1	thyroid cancer
21896990	rs1867277	FOXE1	papillary thyroid carcinoma
21896990	rs1867277	FOXE1	thyroid carcinoma
21940774	rs430397	GRP78	advanced NSCLC
21940774	rs430397	GRP78	non-small cell lung cancer
21952824	Arg72Pro	TP53	ovarian cancer
21966542
21993316	Pro198Leu	GPx1	prostate cancer
21997313	I655V	HER2	breast cancer
22022465
22025681
22067088
22075483
22078348	4837A &gt ; G	BRCA1	breast cancer
22078348	c271T &gt ; G	BRCA1	breast cancer
22084573	D67Y	BRCA1	breast cancer
22084573	D67E	BRCA1	breast cancer
22104201
22119201	SNP309TG	MDM2	endometrial cancer
22119201	SNP309TG	MDM2	prostatic cancer
22134442
22159250
22182840
22213464
22223432	G12V	K-ras	colorectal cancer
22223432	G12D	K-ras	colorectal cancer
22223432	G13D	K-ras	colorectal cancer
22292665	Ile462Val	M1	breast cancer
22296361	A1298C	OR	bladder cancer
22296361	C677T	MTHFR	bladder cancer
22329297	Gly13Asp	KRAS	colorectal cancer
22329297	Gly12Val	KRAS	colorectal cancer
22329297	Gly12Cys	KRAS	colorectal cancer
22329297	Gly12Ser	KRAS	colorectal cancer
22329297	Gly12Asp	KRAS	colorectal cancer
22866155	A502 Y	pdgfra	gastrointestinal stromal tumors
22866155	D842V	pdgfra	gastrointestinal stromal tumors
23383541
24688158	Arg677Trp	TLR2	superficial bladder cancer
24688158	Arg753Gln	TLR2	superficial bladder cancer
24688158	arginine677tryptophan	TLR2	superficial bladder cancer
